# Supplementary material for: Gadolinium-enhanced intracranial aneurysm wall imaging and risk of aneurysm growth and rupture: a multicentre longitudinal cohort study
Source: PubMed Central journal article supplement (PMC11213723; doi:10.1007/s00330-023-10388-7), 2023-12-18
Supplement: 330_2023_10388_MOESM1_ESM.pdf [file 330_2023_10388_MOESM1_ESM.pdf]

**eTable 1**

| Cohort                                                | Included patients<br>N | Included aneurysms<br>N |
|-------------------------------------------------------|------------------------|-------------------------|
| <b>Paris, France</b> <sup>†</sup>                     |                        |                         |
| Centre Hospitalier Sainte-Anne                        | 125                    | 142                     |
| <b>Hiroshima, Japan</b>                               |                        |                         |
| Hiroshima City Asa Citizens Hospital                  | 89                     | 115                     |
| <b>Southampton, United Kingdom</b>                    |                        |                         |
| University Hospital Southampton NHS Foundation Trust  | 67                     | 98                      |
| <b>Utrecht, The Netherlands</b> <sup>‡</sup>          |                        |                         |
| University Medical Centre Utrecht                     | 76                     | 87                      |
| <b>Washington, United States of America</b>           |                        |                         |
| University of Washington School of Medicine           | 18                     | 26                      |
| <b>San Francisco, United States of America</b>        |                        |                         |
| University of California San Francisco                | 23                     | 26                      |
| <b>Beijing, China</b>                                 |                        |                         |
| Capital Medical University Xuanwu Hospital            | 21                     | 26                      |
| Tsinghua University <sup>c</sup>                      | 3                      | 3                       |
| <b>Hiroshima, Japan</b>                               |                        |                         |
| Hiroshima University                                  | 9                      | 12                      |
| <b>Shanghai, China</b>                                |                        |                         |
| Changhai Hospital                                     | 11                     | 11                      |
| Ren Ji Hospital                                       | 3                      | 3                       |
| <b>Zhengzhou, China</b>                               |                        |                         |
| The First Affiliated Hospital of Zhengzhou University | 10                     | 10                      |

<sup>†</sup> 125 patients from Paris were previously described in the study by Gariel et al (Stroke 2020; 129 patients). Patients with >15 mm were excluded for the current study. Moreover, morphological change was not considered as an outcome event in the current study.

<sup>‡</sup> 48 patients from Utrecht were previously described in the study by Vergouwen et al (AJNR 2019; 57 patients). Patients with CTA follow-up were excluded for the current study.

<sup>§</sup> 3 patients from Beijing were previously described in the study by Qi et al (AJNR 2019; 29 patients). Patients without follow-up were excluded for the current study.

| <b>Cohort</b>                                           | <b>Centre Hospitalier Sainte-Anne</b>                        | <b>Hiroshima City Asa Citizens Hospital</b> | <b>University Hospital Southampton NHS Foundation Trust</b> | <b>University Medical Centre Utrecht</b>                              | <b>Philips</b>                                                        | <b>Philips</b>   | <b>University of Washington School of Medicine</b>                           |
|---------------------------------------------------------|--------------------------------------------------------------|---------------------------------------------|-------------------------------------------------------------|-----------------------------------------------------------------------|-----------------------------------------------------------------------|------------------|------------------------------------------------------------------------------|
| <b>Vendor</b>                                           | GE Healthcare                                                | GE Healthcare                               | Siemens                                                     | Philips                                                               | Philips                                                               | Philips          | Siemens                                                                      |
| <b>Magnet strength</b>                                  | 3T                                                           | 1.5T                                        | 3T                                                          | 3T                                                                    | 3T                                                                    | 7T               | 3T                                                                           |
| <b>Acquired spatial resolution (mm)</b>                 | 0.9x0.9x1                                                    | 1x1x1                                       | 0.5x0.5x0.5                                                 | 0.5 x 0.5 x 1                                                         | 0.6 x 0.6 x 1                                                         | 0.6x0.6x0.6      | 0.56x0.56x0.56                                                               |
| <b>Reconstructed spatial resolution (mm)</b>            | 0.45x0.45x0.5                                                | 1x1x1                                       | 0.5x0.5x0.5                                                 | 0.5x0.5x0.5                                                           | 0.5 x 0.5 x 0.5                                                       | 0.6x0.6x0.6      | 0.56x0.56x0.56                                                               |
| <b>Time between gd injection and start AWI gd (min)</b> | 1                                                            | 1:30                                        | 2                                                           | 5                                                                     | 5                                                                     | 4:30             | 5                                                                            |
| <b>Acquisition time of vessel wall imaging (min)</b>    | 4:16                                                         | 3:39                                        | 8                                                           | 8:03                                                                  | 6                                                                     | 8:03             | 8:08 (T1 SPACE); 5:11 (DANTE CAIPI)                                          |
| <b>Pulse sequence type</b>                              | 3DT1- CUBE FastSpinEcho with variable refocussing flip angle | 3D FSE CUBE                                 | 3DT1- FastSpinEcho with variable flip angle train           | 3D multishot turbo spin-echo sequence                                 | 3D multishot turbo spin-echo sequence                                 | Turbo field echo | 3DT1 SPACE with variable refocussing flip angle; 3D turbo spin-echo sequence |
| <b>Repetition time (ms)<br/>Echo time (ms)</b>          | 600<br>11.5                                                  | 550<br>10                                   | 938<br>24                                                   | 1.500<br>36                                                           | 1500<br>32.4                                                          | 8.2<br>4.4       | 1100<br>11                                                                   |
| <b>Flow-suppression method</b>                          | Black blood                                                  | Black blood                                 | Black blood                                                 | Black blood Anti drive pulse with tissue specific refocussing control | Black blood Anti drive pulse with tissue specific refocussing control | Black blood      | non-DANTE T1 space; DANTE                                                    |
| <b>Neuro-radiologists' experience</b>                   | ≥15 years                                                    | >25 years                                   | >20 years                                                   | >10 years                                                             | >15 years                                                             | >10 years        | ≥19 years                                                                    |

Abbreviations: gd = gadolinium; AWI = aneurysm wall imaging; DANTE = Delay Alternating with Nutation for Tailored Excitation.

| <b>Cohort</b>                                                                                            | <b>University of California San Francisco</b>             | <b>Capital Medical University Xuanwu Hospital</b>         | <b>Tsinghua University</b>                                | <b>Hiroshima University</b>           | <b>Changhai Hospital</b>                                  | <b>Ren Ji Hospital</b>                                    | <b>The First Affiliated Hospital of Zhengzhou University</b> |
|----------------------------------------------------------------------------------------------------------|-----------------------------------------------------------|-----------------------------------------------------------|-----------------------------------------------------------|---------------------------------------|-----------------------------------------------------------|-----------------------------------------------------------|--------------------------------------------------------------|
| <b>Vendor</b>                                                                                            | Siemens                                                   | Siemens                                                   | Philips                                                   | Philips                               | Siemens                                                   | Siemens                                                   | Siemens                                                      |
| <b>Magnet strength</b>                                                                                   | 3T                                                        | 3T                                                        | 3T                                                        | 3T                                    | 3T                                                        | 3T                                                        | 3T                                                           |
| <b>Acquired spatial resolution (mm)</b>                                                                  | 0.5x0.5x0.5                                               | 0.6x0.6x0.7                                               | 0.6x0.6x0.6                                               | 0.98x 0.99 x 1                        | 0.5x0.5x0.5                                               | 0.6x0.6x0.6                                               | 0.6x0.6x0.6                                                  |
| <b>Reconstructed spatial resolution (mm)</b>                                                             | 0.5x0.5x0.5                                               | 0.6x0.6x0.7                                               | 0.6x0.6x0.6                                               | 0.46x0.46 x0.5                        | 0.5x0.5x0.5                                               | 0.6x0.6x0.6                                               | 0.6x0.6x0.6                                                  |
| <b>Time between gd injection and start AWI gd (min)</b>                                                  | 2                                                         | 2                                                         | 6                                                         | 5                                     | 2                                                         | 2                                                         | 2                                                            |
| <b>Acquisition time of vessel wall imaging (min)</b>                                                     | 9:58                                                      | 8:14                                                      | 4:23                                                      | 4:42                                  | 8                                                         | 9:13                                                      | 7:36                                                         |
| <b>Pulse sequence type</b>                                                                               | 3D SPACE (turbo spin echo with variable flip angle train) | 3D SPACE (turbo spin echo with variable flip angle train) | 3D VISTA (turbo spin echo with variable flip angle train) | 3D multishot turbo spin-echo sequence | 3D SPACE (turbo spin echo with variable flip angle train) | 3D SPACE (turbo spin echo with variable flip angle train) | 3D SPACE (turbo spin echo with variable flip angle train)    |
| <b>Repetition time (ms)<br/>Echo time (ms)</b>                                                           | 1000<br>17                                                | 900<br>20                                                 | 700<br>30                                                 | 400<br>13                             | 900<br>5.6                                                | 1000<br>15                                                | 800<br>14                                                    |
| <b>Flow-suppression method</b>                                                                           | Black blood                                               | Black blood                                               | Black blood                                               | Black blood, MSDE                     | Black blood                                               | Black blood                                               | Black blood                                                  |
| <b>Neuro-radiologists' experience</b>                                                                    | >10 years                                                 | >10 years                                                 | >10 years                                                 | >10 years                             | >10 years                                                 | >10 years                                                 | >10 years                                                    |
| Abbreviations: gd = gadolinium; AWI = aneurysm wall imaging; MSDE = motion-sensitized driven-equilibrium |                                                           |                                                           |                                                           |                                       |                                                           |                                                           |                                                              |
